# Supplementary material for: Crystallization design of MnO2 towards better supercapacitance
Source: Royal Society of Chemistry journal article supplement (doi:10.1039/c2ce25610j), 2012-01-01
Supplement: c2ce25610j.pdf [file c2ce25610j.pdf]

## Crystallization Design of MnO<sub>2</sub> towards Better Supercapacitance

Yuanjian Zhang<sup>a</sup>, Congting Sun<sup>a,b</sup>, Pai Lu<sup>a</sup>, Keyan Li<sup>a</sup>, Shuyan Song<sup>b</sup>, Dongfeng Xue<sup>a,b,\*</sup>

<sup>a</sup>*School of Chemical Engineering, Dalian University of Technology, Dalian 116024, China*

<sup>b</sup>*State Key Laboratory of Rare Earth Resource Utilization, Changchun Institute of Applied Chemistry, Chinese Academy of Sciences, Changchun 130022, China*

\*Corresponding author. E-mail: dongfeng@ciac.jl.cn

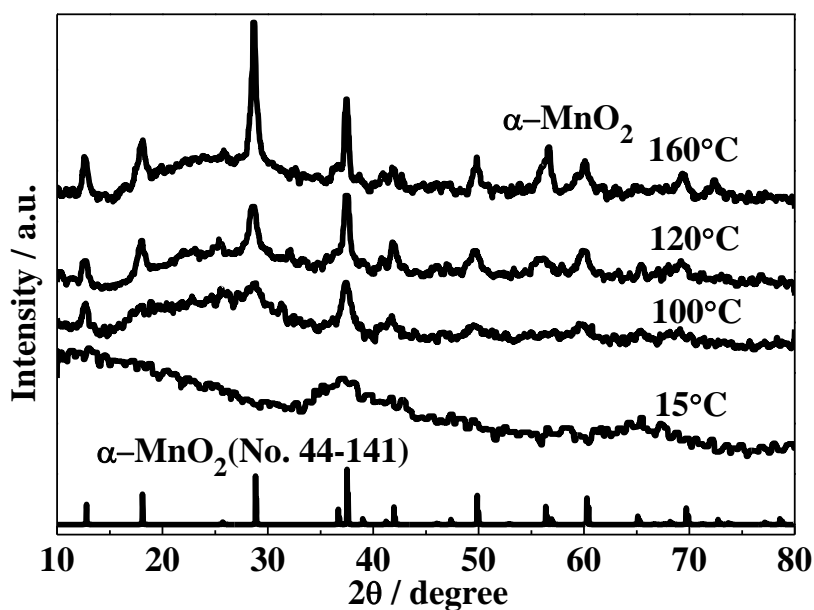

Fig. S1. XRD pattern of  $\alpha$ -MnO<sub>2</sub> synthesized at different reaction temperature aged for 10 h.

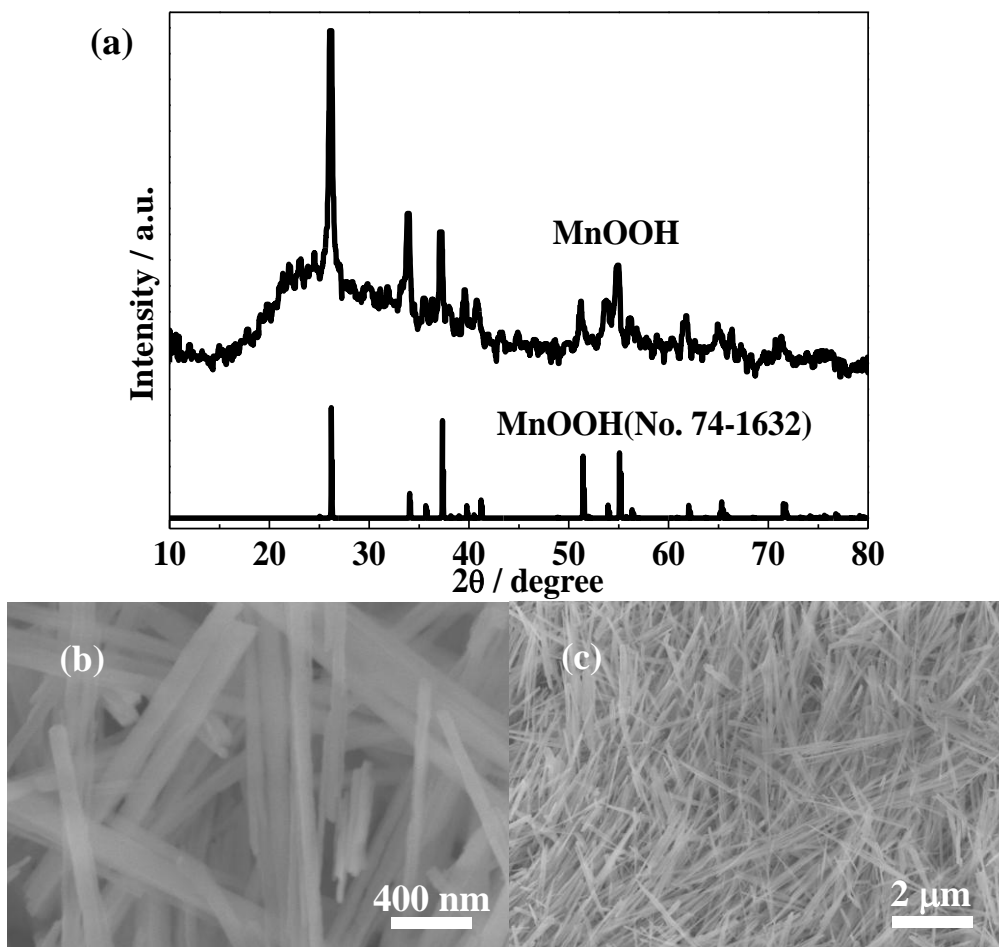

Fig. S2. XRD patterns (a) and SEM images(b), (c) of MnOOH.
